# Supplementary material for: Metabolism of l-arabinose converges with virulence regulation to promote enteric pathogen fitness
Source: PubMed Central journal article supplement (PMC11127945; doi:10.1038/s41467-024-48933-7), 2024-05-25

## **Supplementary information**

### **Metabolism of L-arabinose converges with virulence regulation to promote enteric pathogen fitness**

Curtis Cottam, Rhys T White, Lauren C Beck, Christopher J Stewart, Scott A Beatson, Elisabeth  
C Lowe, Rhys Grinter and James PR Connolly

**Supplementary figures 1-12**

**Supplementary table 1** – Bacterial strains used in this study.

**Supplementary table 2** – Plasmids used in this study.

**Supplementary table 3** – Primers used in this study.

**Supplementary references**

**Uncropped images**

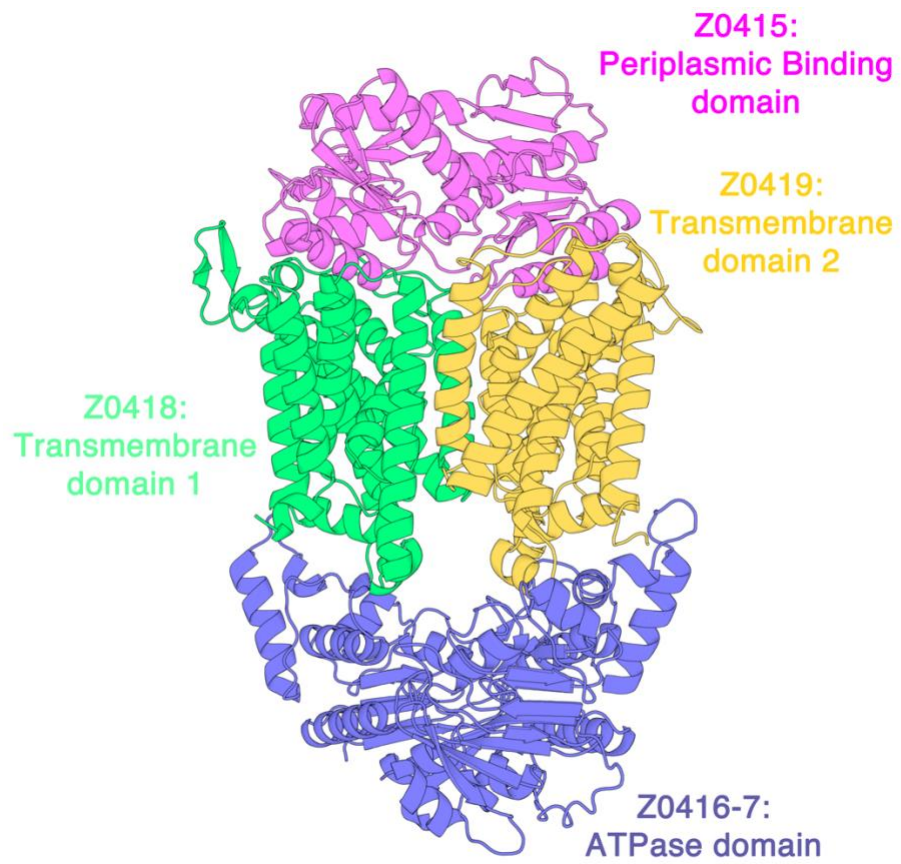

**Supplementary Figure 1. Model of the Z0415-9 ABC transporter.** AlphaFold2 model of the predicted Z0415-9 structure assembled at the EHEC inner membrane.

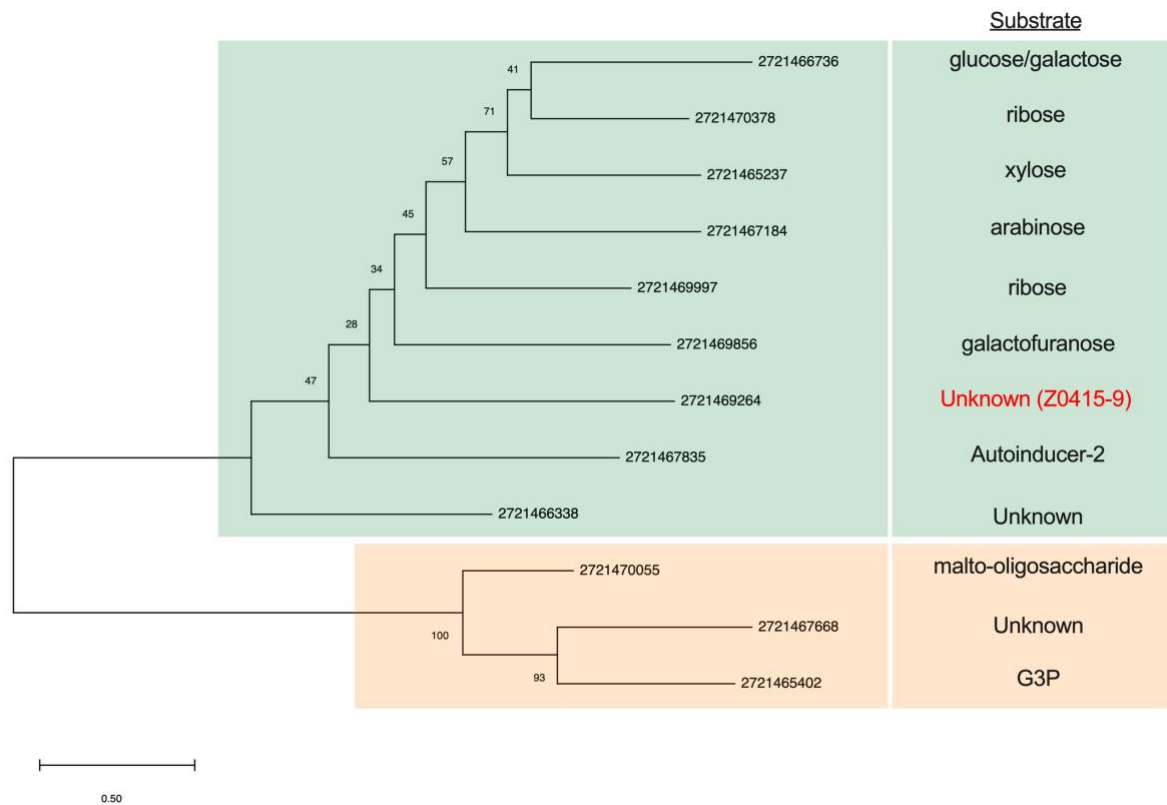

**Supplementary Figure 2. Phylogenetic analysis of sugar-specific ABC transporters in EDL933.** Phylogeny was inferred using the maximum-likelihood method and Le Gascuel model, with a Gamma distribution in MegaX. The tree is drawn to scale, with branch lengths measured in the number of substitutions per site. The scale bar represents 0.5 substitutions per site. Bootstrap values are indicated on the respective branches. Clades A and B are coloured green and orange respectively. The predicted substrate for each transporter is indicated next to its respective branch in the tree.

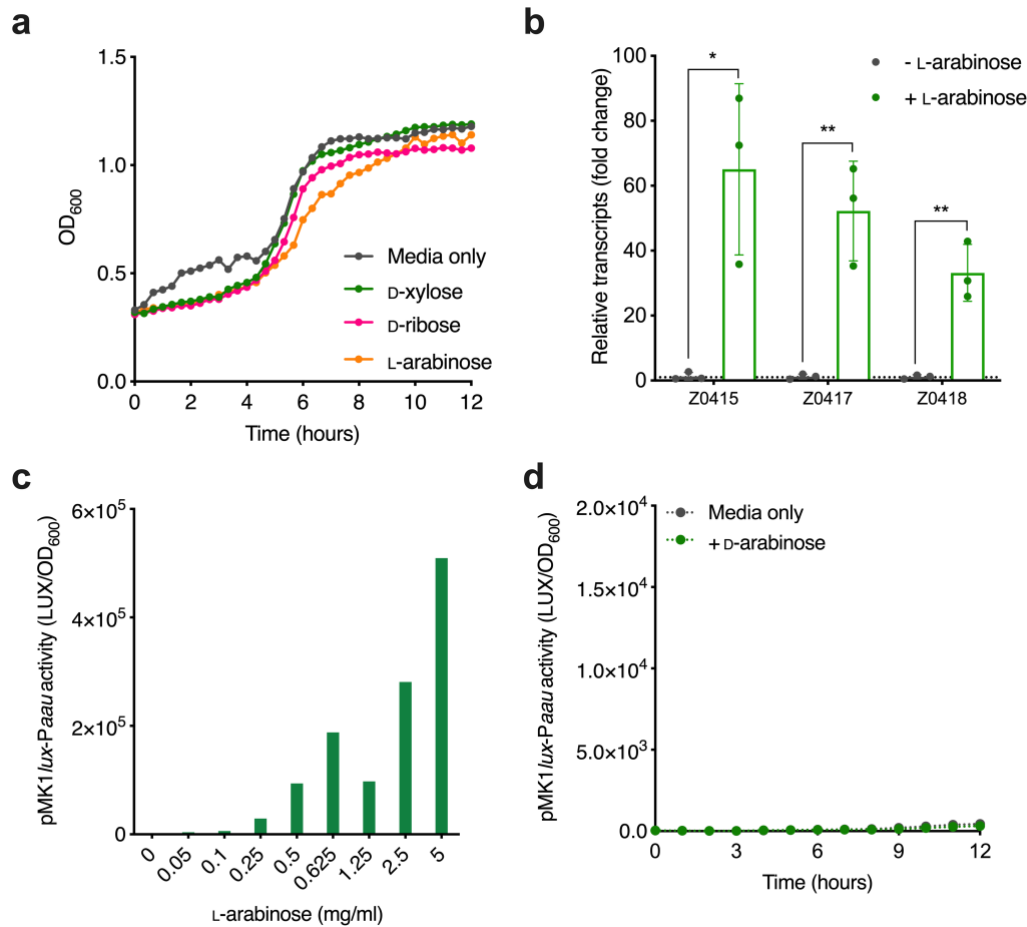

**Supplementary Figure 3. The L-isomer of arabinose induces Z0415-9 in a concentration dependent manner.** **a**, Growth curve depicting OD<sub>600</sub> values ( $n = 1$ , repeated on three independent occasions) over time of EHEC cultured in MEM-HEPES alone or supplemented with 0.5 mg/ml of L-arabinose (green), D-ribose (pink) or D-xylose (orange). **b**, RT-qPCR analysis of Z0415/7/8 expression in RNA-derived from EHEC cultured in MEM-HEPES alone (grey) or supplemented with L-arabinose (green). The bars indicate relative fold-increase of L-arabinose treated cultures over media alone. The dotted line indicates baseline expression in comparison to the control. Statistical significance was determined by two-tailed Student's  $t$  test. \* and \*\* indicate  $P < 0.05$  or  $P < 0.01$  respectively. Error bars represent standard deviation from  $n = 3$  biological replicates. **c**, Transcriptional reporter assay of EHEC transformed with pMK1lux-Paau cultured in MEM-HEPES alone or supplemented with a range of L-arabinose concentrations. Data are depicted as luminescence units (LUX) divided by optical density (OD<sub>600</sub>) of the culture after 8 hours of growth ( $n = 1$ ). **d**, Transcriptional reporter assay of EHEC transformed with pMK1lux-Paau cultured in MEM-HEPES alone or supplemented with 0.5 mg/ml D-arabinose ( $n = 3$  biological replicates).

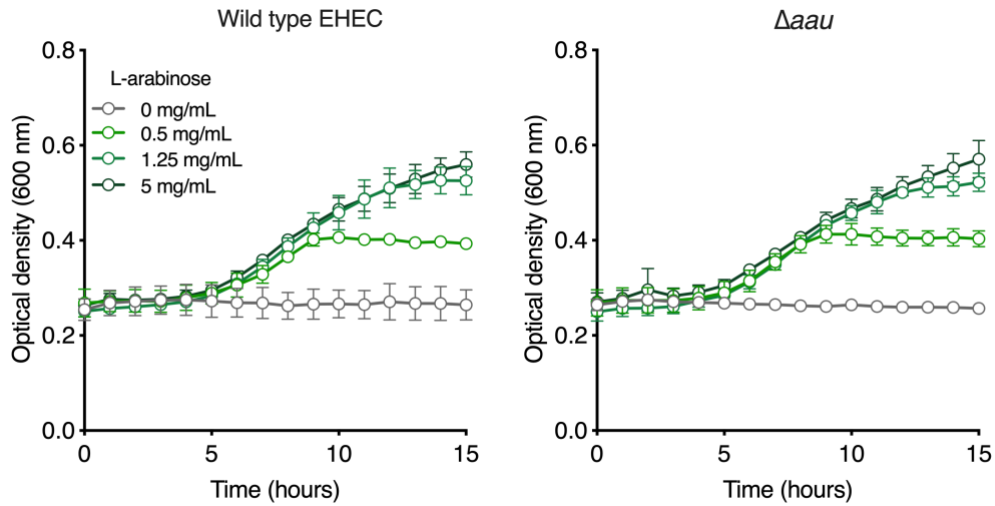

**Supplementary Figure 4. Aau is not required for growth on L-arabinose as a sole carbon source.** Growth analysis of EHEC ZAP193 and associated  $\Delta aau$  deletion mutant in M9 minimal media supplemented with various concentrations of L-arabinose as a sole carbon source as labelled on the graph (light, medium and dark green; grey for no carbon source control). The error bars indicate standard deviation based on  $n = 3$  biological replicates.

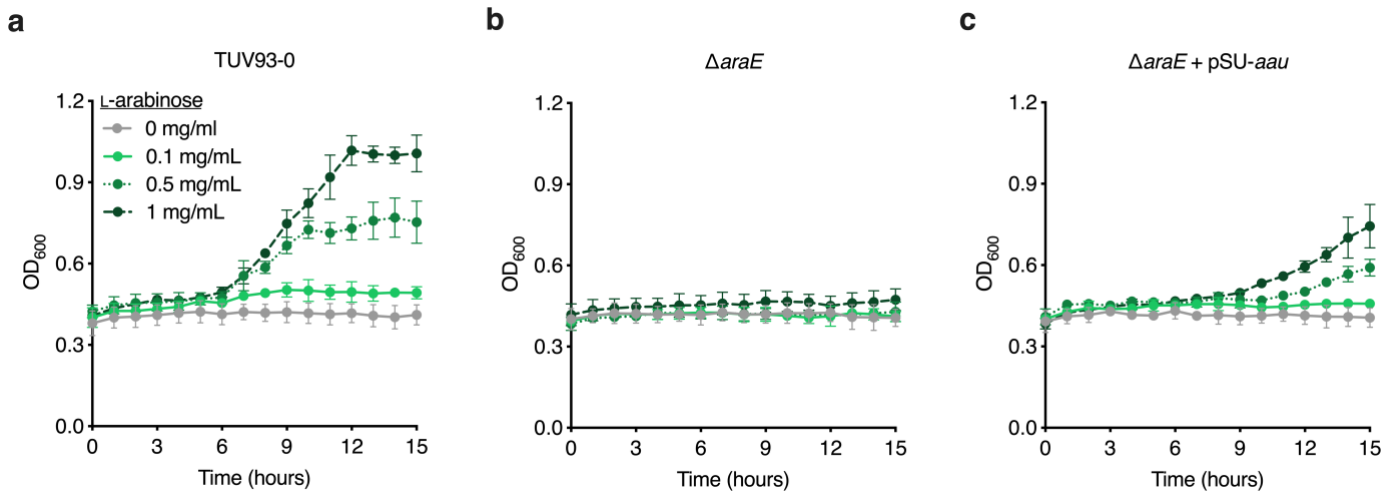

**Supplementary Figure 5. Plasmid-expressed Aau enhances growth on L-arabinose in an EHEC strain with a non-functional *aau* locus.** **a**, Growth analysis of EHEC TUV93-0 wild type in M9 minimal media containing various concentrations of L-arabinose as the sole carbon source as labelled on the graph (light, medium and dark green; grey for no carbon source control). **b**, Growth analysis of TUV93-0  $\Delta araE$  under the same conditions. **c**, Growth analysis of TUV93-0  $\Delta araE$  transformed with pSU-*aau* (encoding the entire *aau* locus from ZAP193) under the same conditions. Error bars represent standard deviation based on  $n = 3$  biological replicates.

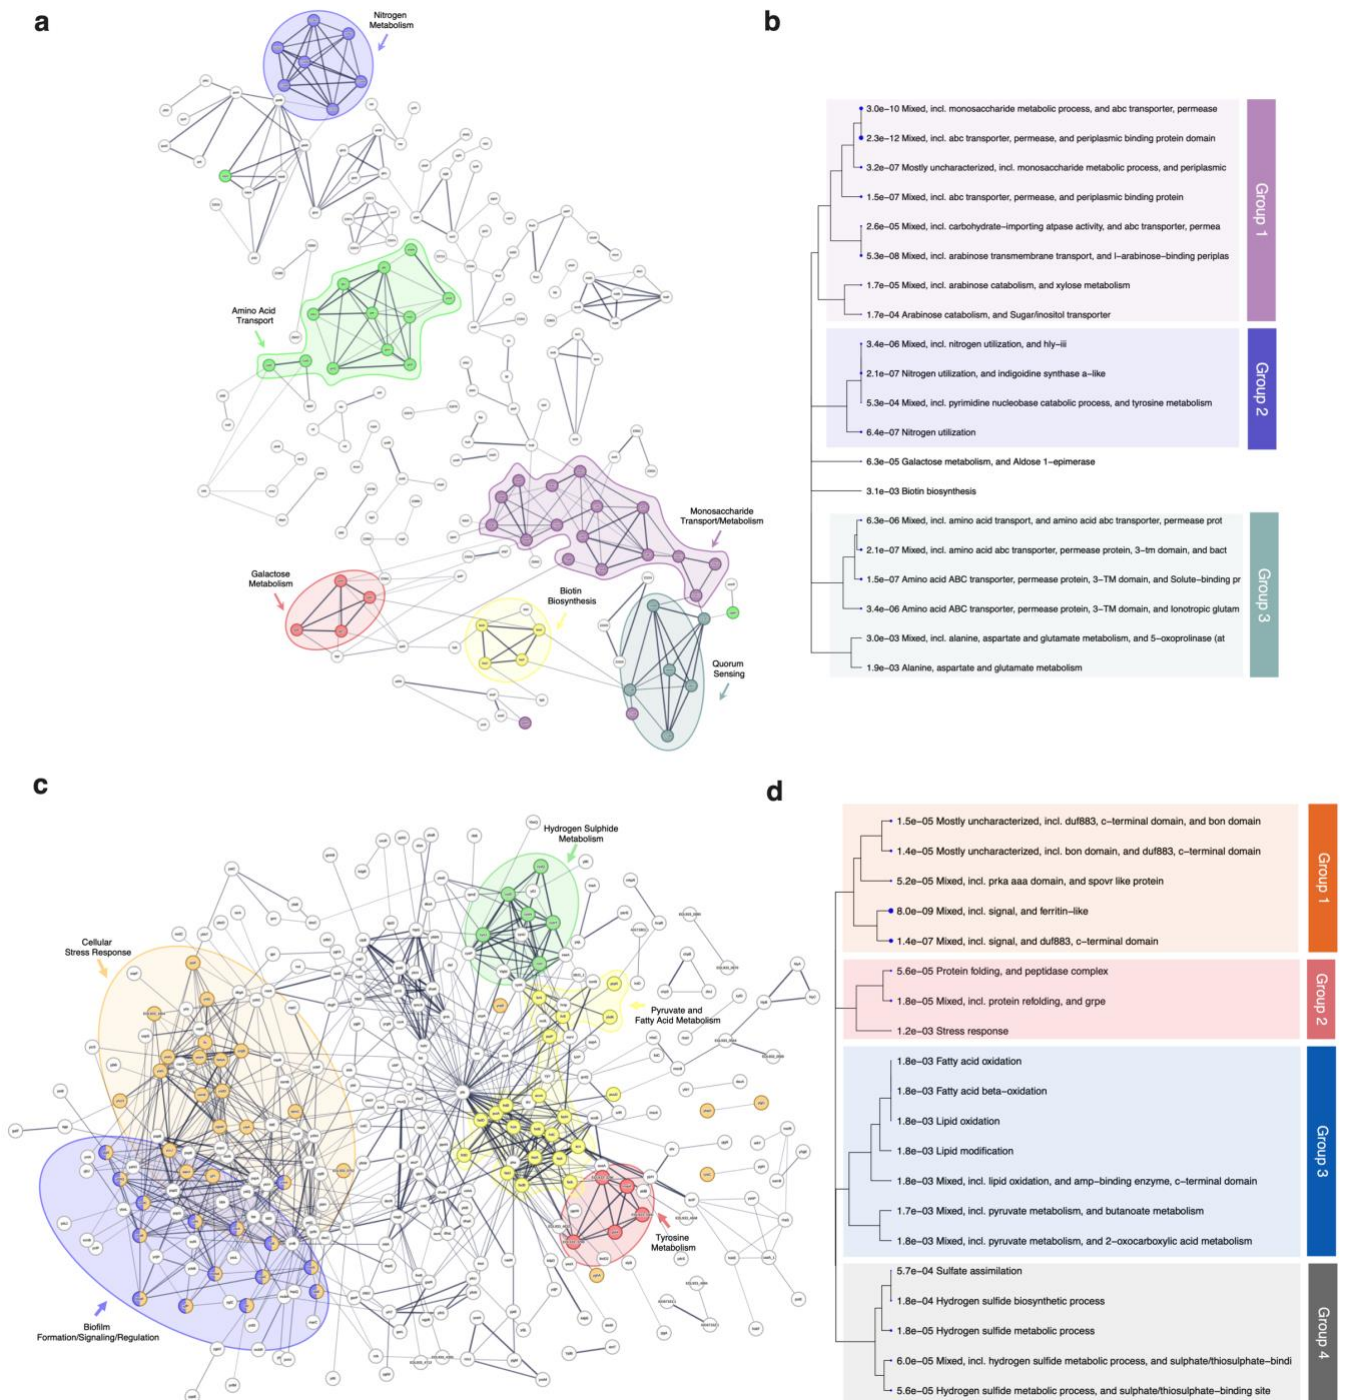

**Supplementary Figure 6. L-arabinose induces a global transcriptional shift in EHEC. a,c,** STRING network analysis of predicted protein-protein interactions based upon upregulated or downregulated genes identified by RNA-seq analysis of EHEC cultured in MEM-HEPES supplemented with L-arabinose. Line thickness is indicative of confidence in the interactions between proteins. Disconnected nodes were removed from the network to improve clarity. Distinct functional clusters that are enriched are in coloured bubbles. **b,d,** Hierarchical clustering tree summarising the correlation among significant STRING pathways generated using ShinyGO. Pathways that are enriched with shared genes are grouped together. Larger dots indicate more significant *P*-values.

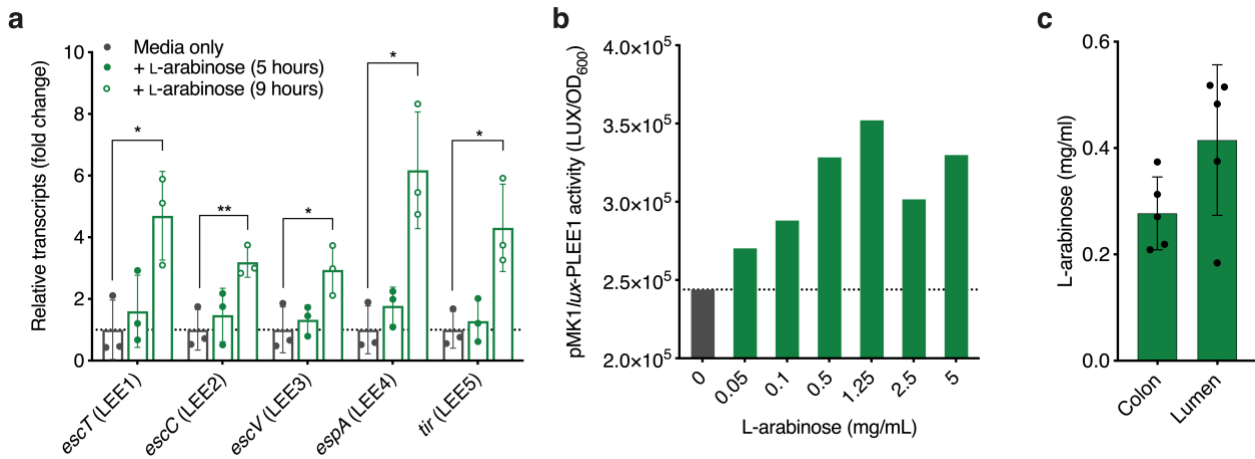

**Supplementary Figure 7. L-arabinose induces LEE expression at concentration relevant to the gut.** **a**, RT-qPCR analysis of relative LEE1-5 expression in RNA-derived from EHEC cultured in MEM-HEPES alone (grey) or supplemented with L-arabinose (green). The bars indicate relative fold-increase of L-arabinose treated cultures over media alone. The dotted line indicates baseline expression in comparison to the control. Statistical significance was determined by two-tailed Student's *t* test. \* and \*\* indicate  $P < 0.05$  or  $P < 0.01$  respectively. Error bars represent standard deviation from  $n = 3$  biological replicates. **b**, Transcriptional reporter assay of EHEC transformed with pMK1lux-PLLEE1 cultured in MEM-HEPES alone (grey) or supplemented with a range of L-arabinose concentrations (green). Data are depicted as luminescence units (LUX) divided by optical density (OD<sub>600</sub>) of the culture after 8 hours of growth. The data represent a single replicate ( $n = 1$ ) from three independent repeats of the experiment. **c**, Quantification of L-arabinose from colon tissue and luminal content of BALB/c mice maintained on a conventional diet ( $n = 5$ ).



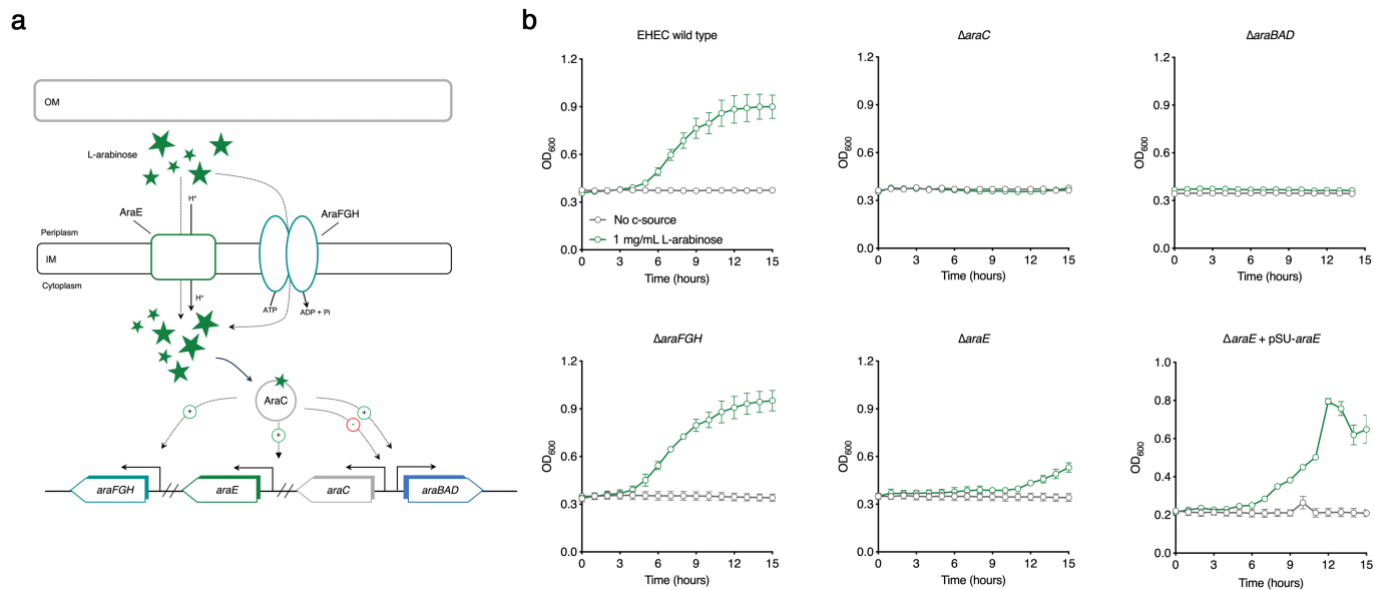

**Supplementary Figure 8. Growth analysis of mutants from each stage of the L-arabinose utilisation pathway in EHEC.** **a**, Schematic illustration of the canonical pathway for L-arabinose uptake, sensing and catabolism within the cell. **b**, Growth curves of wild type EHEC and the indicated deletion mutants in M9 minimal media with no carbon source (grey, control) or supplemented with 1 mg/ml L-arabinose (green). Experiments Error bars represent the standard deviation derived from  $n = 3$  biological replicates for all mutants except  $\Delta araBAD$  ( $n = 2$ ).

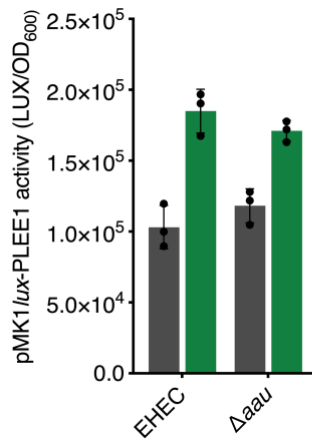

**Supplementary Figure 9. Aau does not mediate enhanced LEE expression in response to L-arabinose *in vitro*.** Transcriptional reporter assay of EHEC and the *aau* deletion mutant transformed with pMK1/lux-PLLEE1. Strains were cultured in MEM-HEPES alone (grey) or supplemented with L-arabinose (green). Data are depicted as luminescence units (LUX) divided by optical density (OD<sub>600</sub>) sampled after 8 hours of growth. Error bars represent standard error of the mean derived from  $n = 3$  biological replicates.

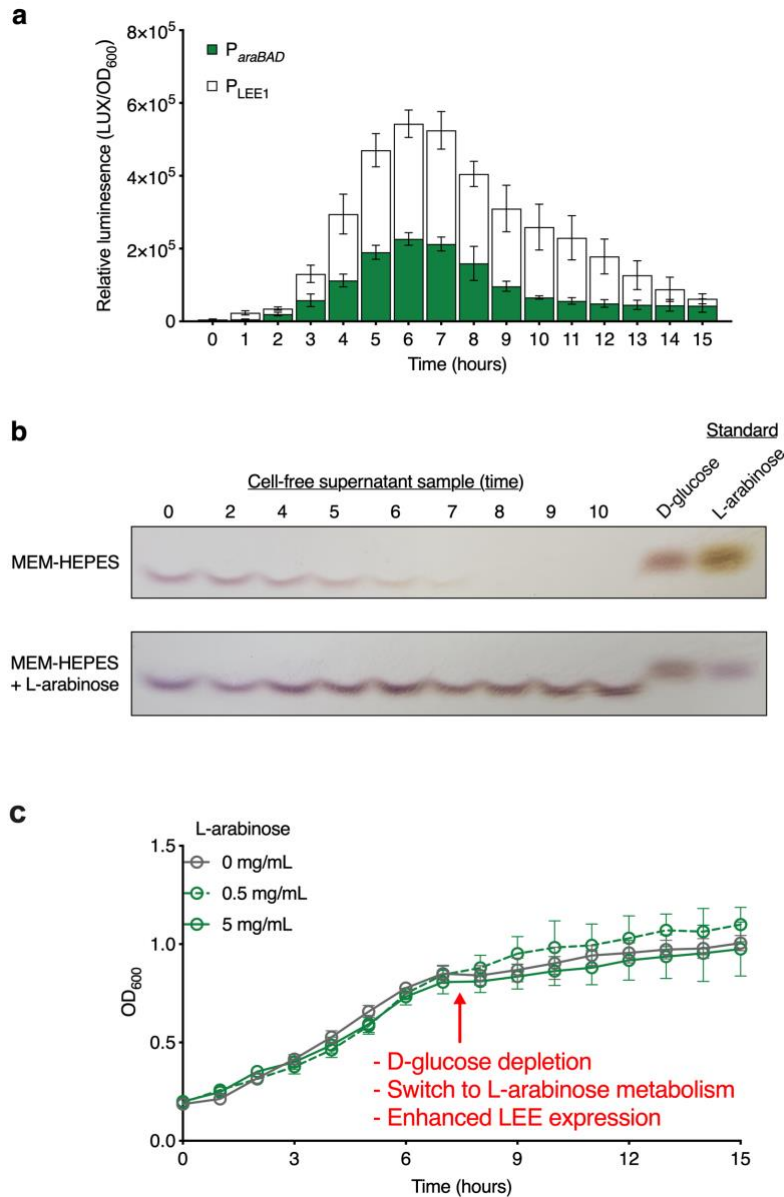

**Supplementary Figure 10. L-arabinose metabolism and enhanced LEE expression are coordinated in EHEC.** **a**, Transcriptional reporter assay of EHEC transformed with either pMK1lux-*PLEE1* (white bars) or pMK1lux-*ParaBAD* (green bars) cultured in MEM-HEPES supplemented with L-arabinose. The experiments were performed under identical growth conditions and samples taken in parallel. The data are depicted as luminescence units (LUX) divided by optical density (OD<sub>600</sub>) of the culture at each timepoint. Error bars indicate standard error of the mean from  $n = 3$  (*LEE1*) or  $n = 5$  (*araBAD*) biological replicates. **b**, Thin layer chromatography analysis of cell-free supernatant derived from cultures of EHEC grown in MEM-HEPES alone or supplemented with 1 mg/ml L-arabinose. Samples were taken at the indicated timepoints and the standards for D-glucose and L-arabinose are positioned on the right. The result represents a single replicate from three independent experiments. **c**, Growth curve of EHEC grown in MEM-HEPES alone or supplemented with various concentrations of L-arabinose ( $n = 3$ ). The red arrow indicates the point at which D-glucose is depleted from the media (derived from panel **b**) and the phenotypic switch associated with this event.

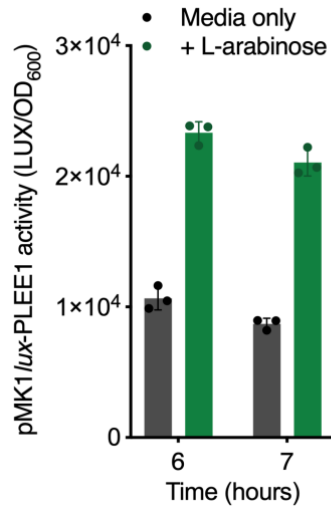

**Supplementary Figure 11. L-arabinose induces LEE expression in *C.rodentium*.** Transcriptional reporter assay of wild type *C. rodentium* transformed with pMK1/lux-PL EE1 cultured in MEM-HEPES alone (grey) or supplemented with L-arabinose (green). Data are depicted as luminescence units (LUX) divided by optical density (OD<sub>600</sub>) of the sample at various timepoints. Error bars represent standard error of the mean derived from  $n = 3$  biological replicates.

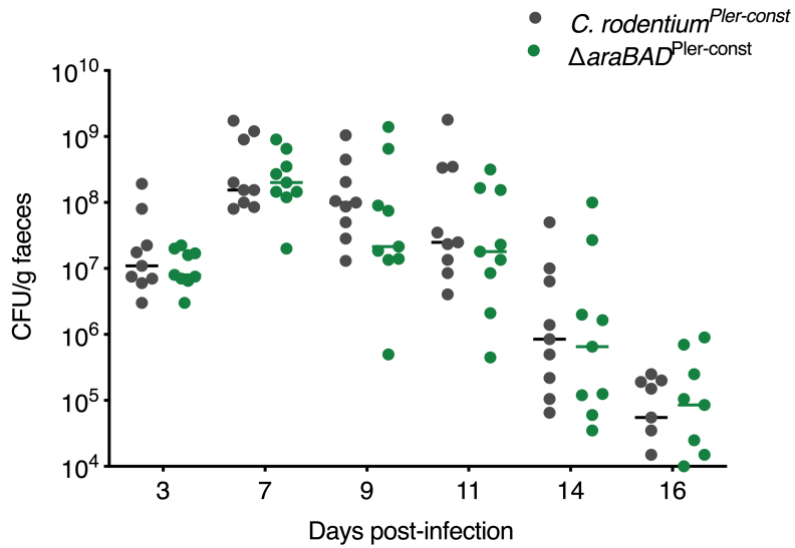

**Supplementary Figure 12. Constitutive expression of *ler* overcomes the fitness defect associated with deletion of *araBAD*.** Faecal shedding dynamics of BALB/c mice ( $n = 9$ ) colonised with a 1:1 mixture of *C. rodentium*<sup>Pler-const</sup> (grey) and  $\Delta$ *araBAD*<sup>Pler-const</sup> (green) by oral gavage. Data points indicate the relative CFU recovered from faecal samples on each day.

**Supplementary Table 1** – Bacterial strains used in this study.

| Strain                         | Description                                                                                          | Reference                             |
|--------------------------------|------------------------------------------------------------------------------------------------------|---------------------------------------|
| ZAP193                         | EHEC O157:H7 str. ZAP193 (NCTC 12900)<br>Stx <sup>-</sup>                                            | Roe <i>et al.</i> 2004                |
| TUV93-0                        | EHEC O157:H7 str. EDL933 Stx <sup>-</sup>                                                            | Campellone <i>et al.</i> 2002         |
| $\Delta$ <i>araC</i>           | TUV93-0 <i>araC</i> deletion mutant; Kan <sup>R</sup>                                                | This study                            |
| $\Delta$ <i>araBAD</i>         | TUV93-0 <i>araBAD</i> deletion mutant; Kan <sup>R</sup>                                              | This study                            |
| $\Delta$ <i>araFGH</i>         | TUV93-0 <i>araFGH</i> deletion mutant; Kan <sup>R</sup>                                              | This study                            |
| $\Delta$ <i>araE</i>           | TUV93-0 <i>araE</i> deletion mutant; Cm <sup>R</sup>                                                 | This study                            |
| $\Delta$ <i>rbsDACBKR</i>      | TUV93-0 <i>rbsDACBKR</i> deletion mutant; Kan <sup>R</sup>                                           | This study                            |
| ZAP193 $\Delta$ <i>aau</i>     | ZAP193 Z0415-9 deletion mutant; Kan <sup>R</sup><br>Strep <sup>R</sup>                               | This study                            |
| ICC169                         | <i>C. rodentium</i> O152 serotype; NaI <sup>R</sup>                                                  | Petty <i>et al.</i> 2010              |
| ICC169 $\Delta$ <i>araBAD</i>  | ICC169 <i>araBAD</i> deletion mutant; Kan <sup>R</sup>                                               | This study                            |
| ICC1370                        | <i>C. rodentium</i> constitutive-P <sub>ler</sub><br>luminescence; NaI <sup>R</sup> Kan <sup>R</sup> | Mullineaux-Sanders <i>et al.</i> 2017 |
| ICC1370 $\Delta$ <i>araBAD</i> | ICC1370 $\Delta$ <i>araBAD</i> mutant; NaI <sup>R</sup> Kan <sup>R</sup> Cm <sup>R</sup>             | This study                            |

**Supplementary Table 2** – Plasmids used in this study.

| <b>Plasmid</b>                     | <b>Description</b>                                                                    | <b>Reference</b>             |
|------------------------------------|---------------------------------------------------------------------------------------|------------------------------|
| pMK1 <i>lux</i>                    | pBR322 ori with the <i>luxCDABE</i> operon and MCS; Amp <sup>R</sup>                  | Karavolos <i>et al.</i> 2008 |
| pMK1 <i>lux</i> -P <sub>LEE1</sub> | pMK1 <i>lux</i> with TUV93-0 LEE1 promoter cloned into MCS; Amp <sup>R</sup>          | This study                   |
| pMK1 <i>lux</i> -P <sub>aau</sub>  | pMK1 <i>lux</i> with Z0415 promoter cloned into MCS; Amp <sup>R</sup>                 | This study                   |
| pMK1 <i>lux</i> -P <sub>araB</sub> | pMK1 <i>lux</i> with TUV93-0 <i>araB</i> promoter cloned into MCS; Amp <sup>R</sup>   | This study                   |
| pACYC184                           | p15A ori multicopy plasmid; Cm <sup>R</sup> , Tet <sup>R</sup>                        | Lab stock                    |
| pACYC184- <i>araC</i>              | pACYC184 with TUV93-0 <i>araC</i> cloned into MCS; Cm <sup>R</sup> , Tet <sup>R</sup> | This study                   |
| pSUPROM                            | Cloning vector for expression under the TatA promoter; Kan <sup>R</sup>               | Jack <i>et al.</i> 2004      |
| pSU- <i>araC</i>                   | pSUPROM with TUV93-0 <i>araC</i> cloned into MCS; Kan <sup>R</sup>                    | This study                   |
| pSU- <i>araE</i>                   | pSUPROM with TUV93-0 <i>araE</i> cloned into MCS; Kan <sup>R</sup>                    | This study                   |
| pSU- <i>araBADE</i>                | pSUPROM with TUV93-0 <i>araBAD/araE</i> cloned into MCS; Kan <sup>R</sup>             | This study                   |
| pSU- <i>aau</i>                    | pSUPROM with ZAP193 <i>aau</i> cloned into MCS; Kan <sup>R</sup>                      | This study                   |
| pKD46                              | LRed recombinase expressing plasmid; temperature sensitive; Amp <sup>R</sup>          | Datsenko and Wanner, 2000    |
| pKD3                               | Template plasmid for LRed mutagenesis; Cm <sup>R</sup>                                | Datsenko and Wanner, 2000    |
| pKD4                               | Template plasmid for LRed mutagenesis; Kan <sup>R</sup>                               | Datsenko and Wanner, 2000    |
| pCP20                              | FLP recombinase expressing plasmid; temperature sensitive; Amp <sup>R</sup>           | Datsenko and Wanner, 2000    |
| <i>prpsM</i> :GFP                  | pACYC184, <i>rpsM</i> :GFP transcriptional fusion                                     | Roe <i>et al.</i> 2004       |

**Supplementary Table 3** – Primers used in this study.

| Primer name           | Description                                | Sequence                                                                                 |
|-----------------------|--------------------------------------------|------------------------------------------------------------------------------------------|
| Z0415-9_LRed_Fwd      | Z0415-9 KO forward primer                  | gcgcgctaatttgggcgaacactt<br>cctgactaccctgcaatgaggctg<br>aagtgtaggctggagctgcttc           |
| Z0415-9_LRed_Rev      | Z0415-9 KO reverse primer                  | cgctgatatgtcatcgcggcaa<br>aacgctccattgaatatagcca<br>atatcatatgaatatcctccttag             |
| Z0415-9_Check_Fwd     | Z0415-9 KO forward check primer            | tctctccagcgcgcta                                                                         |
| Z0415-9_Check_Rev     | Z0415-9 KO reverse check primer            | atgtcatcgcggcaaac                                                                        |
| EHEC_araE_LRed_Fwd    | EHEC <i>araE</i> KO forward primer         | attgttcagctatTTTTcactatgt<br>cttactctctgctggcaggaaaaa<br>gtgtaggctggagctgcttc            |
| EHEC_araE_LRed_Rev    | EHEC <i>araE</i> KO reverse primer         | ctctattaacgaaaaaggccg<br>gatgtacagcacatccggcccg<br>gaaacatatgaatatcctccttag              |
| EHEC_araE_Check_Fwd   | EHEC <i>araE</i> KO check forward primer   | aatatccatcacataacggcatg                                                                  |
| EHEC_araE_Check_Rev   | EHEC <i>araE</i> KO check reverse primer   | attcccagctcattcctccc                                                                     |
| EHEC_araFGH_LRed_Fwd  | EHEC <i>araFGH</i> KO forward primer       | tttgcctgcacaaaacgacact<br>aaagctggagagaaccgtgtag<br>gctggagctgcttc                       |
| EHEC_araFGH_LRed_Rev  | EHEC <i>araFGH</i> KO reverse primer       | tgtgtgggaaaaaacgttaaat<br>tgtgtggaaaaagcacatag<br>aatatcctccttag                         |
| EHEC_araFGH_Check_Fwd | EHEC <i>araFGH</i> KO check forward primer | tcccgctaaatttatgcacgt                                                                    |
| EHEC_araFGH_Check_Rev | EHEC <i>araFGH</i> KO check reverse primer | ttgcaacgaagaacagccaa                                                                     |
| EHEC_araBAD_LRed_Fwd  | EHEC <i>araBAD</i> KO forward primer       | gcaactctctactgtttctccatac<br>ccgttttttgatggagtgaaac<br>gggtaggctggagctgcttc              |
| EHEC_araBAD_LRed_Rev  | EHEC <i>araBAD</i> KO reverse primer       | aaaaaacaggcttgattatagc<br>ctggtttcatttgattggctgtggt<br>ttatacagtcacatatgaatc<br>ctccttag |
| EHEC_araBAD_Check_Fwd | EHEC <i>araBAD</i> KO check forward primer | cgtcacactttgctatgcca                                                                     |
| EHEC_araBAD_Check_Rev | EHEC <i>araBAD</i> KO check reverse primer | aagataaacctgcctgcgc                                                                      |
| EHEC_araC_LRed_Fwd    | EHEC <i>araC</i> KO forward primer         | tgcaatatggacaattggtttctc<br>tctgaatggcgggagatgaaaa<br>gtgtgtaggctggagctgcttc             |
| EHEC_araC_LRed_Rev    | EHEC <i>araC</i> KO reverse primer         | caaaccctatgctactccgtaag<br>ccgtcaattgctgattcgttacca<br>acatatgaatatcctccttag             |
| EHEC_araC_Check_Fwd   | EHEC <i>araC</i> KO check forward primer   | tcttctgaatggcgggag                                                                       |



|                                     |                                                          |                                                                                |
|-------------------------------------|----------------------------------------------------------|--------------------------------------------------------------------------------|
| EHEC_araC_Check_Rev                 | EHEC araC KO check reverse primer                        | atggacgaagcagggtattct                                                          |
| Crod_araBAD_LRed_Fwd                | <i>C. rodentium</i> araBAD KO forward primer             | cccactcactactgtttctccatac<br>ccgtatttctggatggagtgaaac<br>ggtgtaggctggagctgcttc |
| Crod_araBAD_LRed_Rev                | <i>C. rodentium</i> araBAD KO reverse primer             | tgtgttccggaataaaaatacgc<br>gccactgtcgggacgcgtattttg<br>catcatatgaatatctccttag  |
| Crod_araBAD_Check_Fwd               | <i>C. rodentium</i> araBAD KO check forward primer       | acaacggcagaatgtccac                                                            |
| Crod_araBAD_Check_Rev               | <i>C. rodentium</i> araBAD KO check reverse primer       | ctttcattcgctggagggc                                                            |
| pMK1lux-P <sub>LEE1</sub> _EHEC_Fwd | Forward primer for cloning EHEC LEE1 promoter with EcoRI | cccgaattcctgtaactcgaatta<br>agt                                                |
| pMK1lux-P <sub>LEE1</sub> _EHEC_Rev | Reverse primer for cloning EHEC LEE1 promoter with BamHI | cccggatccaatctccgcatgctt<br>taata                                              |
| pMK1lux-P <sub>Z0415</sub> _Fwd     | Forward primer for cloning Z0415 promoter with EcoRI     | cccgaattcattcaccagaaatg<br>gacg                                                |
| pMK1lux-P <sub>Z0415</sub> _Rev     | Reverse primer for cloning Z0415 promoter with BamHI     | cccggatccattcagcctcattg<br>cag                                                 |
| pMK1lux-P <sub>araB</sub> _Fwd      | Forward primer for cloning araB promoter with EcoRI      | cccgaattccgggaccaagcca<br>tgac                                                 |
| pMK1lux-P <sub>araB</sub> _Rev      | Reverse primer for cloning araB promoter with XbaI       | gcgctctagacgtttcactccatc<br>caaa                                               |
| pMK1lux_Check_Fwd                   | Forward primer to check pMK1lux cloning                  | ctataaaaataggcgtatcac                                                          |
| pMK1lux_Check_Rev                   | Reverse primer to check pMK1lux cloning                  | ctggccgtaataatgaatg                                                            |
| pACYC184-araC_Fwd                   | araC Gibson assembly forward primer                      | tgaagtcagccccatacagattgc<br>aatcgccatcgtttca                                   |
| pACYC184-araC_Rev                   | araC Gibson assembly reverse primer                      | caatccatgccaacccgttcttat<br>gacaacttgacggct                                    |
| pACYC184_Check_Fwd                  | Forward primer to check pACYC184 cloning                 | gacgctcaaactcagtggtgg                                                          |
| pACYC184_Check_Rev                  | Reverse primer to check pACYC184 cloning                 | gcattcacagttctccgcaa                                                           |
| pACYC184_Linear_Fwd                 | pACYC184 linearisation forward primer                    | gaacgggttgcatggattg                                                            |
| pACYC184_Linear_Rev                 | pACYC184 linearisation reverse primer                    | atcgtatggggctgacttca                                                           |
| pSUPROM-araC_Fwd                    | Forward primer for cloning araC with BamHI               | ggccggatccttcttctgaatgg<br>cgggag                                              |
| pSUPROM-araC_Rev                    | Reverse primer for cloning araC with XbaI                | ggcctctagaatggacgaagcag<br>ggattct                                             |
| pSUPROM-araE_Fwd                    | Forward primer for cloning araE with BamHI               | ggccggatcctgttacttctctgc<br>tggca                                              |

|                                 |                                                            |                                                 |
|---------------------------------|------------------------------------------------------------|-------------------------------------------------|
| pSUPROM- <i>araE</i> _Rev       | Reverse primer for cloning <i>araE</i> with XbaI           | ggcctctagaacgagacaaac<br>gcctcaac               |
| pSUPROM- <i>araBADE</i> _F1_Fwd | <i>araBAD</i> fragment Gibson assembly forward primer      | tctaccacagaggaggatccatg<br>gcgattgcaattggc      |
| pSUPROM- <i>araBADE</i> _F1_Rev | <i>araBAD</i> fragment Gibson assembly reverse primer      | cagcagagagtactgccgtaa<br>tatgcc                 |
| pSUPROM- <i>araBADE</i> _F2_Fwd | <i>araE</i> fragment Gibson assembly forward primer        | cgggcagtaactctctgctggcag<br>gaaaaaatg           |
| pSUPROM- <i>araBADE</i> _F2_Rev | <i>araE</i> fragment Gibson assembly reverse primer        | ctcgagggtcgcactctagatca<br>gacgccgatatttctcaac  |
| pSUPROM- <i>aau</i> _F1_Fwd     | <i>aau</i> Z0415-7 fragment Gibson assembly forward primer | tctaccacagaggaggatccatg<br>atgaataaacgtttgttatc |
| pSUPROM- <i>aau</i> _F1_Rev     | <i>aau</i> Z0415-7 fragment Gibson assembly reverse primer | tttttcagttcagccatttaccac<br>ctc                 |
| pSUPROM- <i>aau</i> _F2_Fwd     | <i>aau</i> Z0418-9 fragment Gibson assembly forward primer | aatggctgaactgaaaaacgc<br>catgaattc              |
| pSUPROM- <i>aau</i> _F2_Rev     | <i>aau</i> Z0418-9 fragment Gibson assembly reverse primer | ctcgagggtcgcactctagattaa<br>accaccgatccag       |
| pSUPROM_Check_Fwd               | Forward primer to check pSUPROM cloning                    | ctcttcgctattacgccagc                            |
| pSUPROM_Check_Rev               | Reverse primer to check pSUPROM cloning                    | accctcatcagtccaacat                             |
| pSUPROM_Linear_Fwd              | pSUPROM linearisation forward primer                       | tctagactcgaccctcg                               |
| pSUPROM_Linear_Rev              | pSUPROM linearisation reverse primer                       | ggatcctcctctgtgtag                              |
| <i>escT</i> _Fwd                | <i>escT</i> RT-qPCR forward primer                         | ttgggctatagatgaggct                             |
| <i>escT</i> _Rev                | <i>escT</i> RT-qPCR reverse primer                         | ggatgaatcgcttatagacggg                          |
| <i>escC</i> _Fwd                | <i>escC</i> RT-qPCR forward primer                         | gctgaagtgagtgcctggtt                            |
| <i>escC</i> _Rev                | <i>escC</i> RT-qPCR reverse primer                         | cctcaagcgggtcaataacg                            |
| <i>escV</i> _Fwd                | <i>escV</i> RT-qPCR forward primer                         | ctaaaagttcctcagtagctgc                          |
| <i>escV</i> _Rev                | <i>escV</i> RT-qPCR reverse primer                         | tcgccagagaaatcatcattca                          |
| <i>espA</i> _Fwd                | <i>espA</i> RT-qPCR forward primer                         | ttcctgtaaatccgatgagc                            |
| <i>espA</i> _Rev                | <i>espA</i> RT-qPCR reverse primer                         | tggtgacgctttgatgagc                             |
| <i>tir</i> _Fwd                 | <i>tir</i> RT-qPCR forward primer                          | ttcctgtaaatccgatgagc                            |
| <i>tir</i> _Rev                 | <i>tir</i> RT-qPCR reverse primer                          | atcgagcggaccatgatcat                            |
| Z0415_Fwd                       | Z0415 RT-qPCR forward primer                               | tggtgtcttcgctgttattagg                          |
| Z0415_Rev                       | Z0415 RT-qPCR reverse primer                               | cacggcataccatcgactta                            |
| Z0417_Fwd                       | Z0417 RT-qPCR forward primer                               | tggaagttccgaccgtattt                            |
| Z0417_Rev                       | Z0417 RT-qPCR reverse primer                               | tcatcaggaaaccgagttggt                           |
| Z0418_Fwd                       | Z0418 RT-qPCR forward primer                               | gccttactggtaatcgctac                            |
| Z0418_Rev                       | Z0418 RT-qPCR reverse primer                               | gtacagccacacactttactc                           |
| Housekeeping_GroEL_Fwd          | GroEL RT-qPCR forward primer                               | accgctgcagttgaagaa                              |
| Housekeeping_GroEL_Rev          | GroEL RT-qPCR reverse primer                               | ctacggtttcgctggagtag                            |
| Housekeeping_GapA_Fwd           | GapA RT-qPCR forward primer                                | cggtagcgttgaagtgaagaa                           |
| Housekeeping_GapA_Rev           | GapA RT-qPCR reverse primer                                | acttcgtccatttcaggtag                            |

### Supplementary references:

Campellone, K.G., Giese, A., Tipper, D.J., and Leong, J.M. A tyrosine- phosphorylated 12- amino-acid sequence of enteropathogenic *Escherichia coli* Tir binds the host adaptor protein Nck and is required for Nck localization to actin pedestals. *Molecular Microbiology* **43**, 1227–1241 (2002).

Datsenko, K. A. and Wanner, B. L. One-step inactivation of chromosomal genes in *Escherichia coli* K-12 using PCR products. *Proceedings of the National Academy of Sciences U. S. A.* **97**, 6640–6645 (2000).

Jack, R. L. *et al.* Coordinating assembly and export of complex bacterial proteins. *EMBO Journal* **23**, 3962–3972 (2004).

Karavolos, M. H. *et al.* Adrenaline modulates the global transcriptional profile of *Salmonella* revealing a role in the antimicrobial peptide and oxidative stress resistance responses. *BMC Genomics* **6**, 458 (2008).

Mullineaux-Sanders, C. *et al.* *Citrobacter rodentium* relies on commensals for colonization of the colonic mucosa. *Cell Reports* **21**, 3381–3389 (2017).

Petty, N. K. *et al.* The *Citrobacter rodentium* genome sequence reveals convergent evolution with human pathogenic *Escherichia coli*. *Journal of Bacteriology* **192**, 525–538 (2010).

Roe AJ, *et al.* Co-ordinate single-cell expression of *LEE4*- and *LEE5*-encoded proteins of *Escherichia coli* O157:H7. *Molecular Microbiology* **54**, 337–352 (2004).

Uncropped images:

Supplementary Figure 10b – Full TLC results

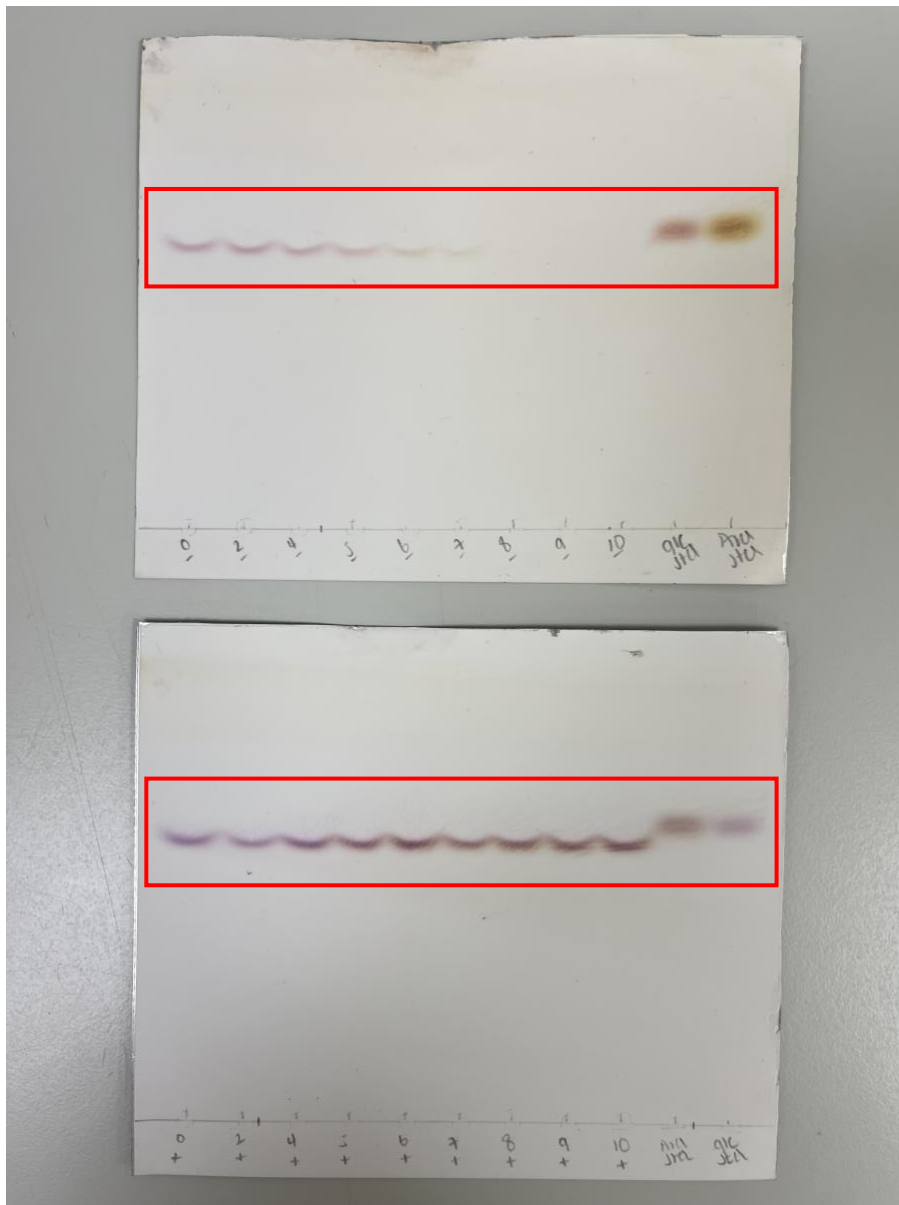

Supplement: 41467_2024_48933_MOESM1_ESM.pdf [file 41467_2024_48933_MOESM1_ESM.pdf]
