# Supplementary material for: Metabolism of l-arabinose converges with virulence regulation to promote enteric pathogen fitness
Source: PubMed Central journal article supplement (PMC11127945; doi:10.1038/s41467-024-48933-7), 2024-05-25
Supplement: 41467_2024_48933_MOESM3_ESM.pdf [file 41467_2024_48933_MOESM3_ESM.pdf]

## **Description of Additional Supplementary files**

**Supplementary Data 1** – Summary of differentially expressed genes identified by RNA-seq. Data derived from EHEC TUV93-0 cultures grown in MEM-HEPES alone (control) or supplemented with 1 mg/ml L-arabinose (treatment).
